# Supplementary material for: Health Risks Awareness of Electronic Waste Workers in the Informal Sector in Nigeria
Source: PubMed Central journal article supplement (PMC5580614; doi:10.3390/ijerph14080911), 2017-08-13
Supplement: ijerph-14-00911-s001.pdf [file ijerph-14-00911-s001.pdf]

# Supplementary Materials: Health Risks Awareness of Electronic Waste Workers in the Informal Sector in Nigeria

Chimere M. Ohajinwa, Peter M. Van Bodegom, Martina G. Vijver and Willie J. G. M. Peijnenburg

**Table S1.** Socio-demographic characteristics of all the informal workers.

| Demographic characteristics |                       | Job Designation         |                           |                |
|-----------------------------|-----------------------|-------------------------|---------------------------|----------------|
|                             |                       | Repairers = 153<br>n(%) | Dismantlers = 126<br>n(%) | Butchers = 221 |
| Location                    | Lagos                 | 67 (43.8)               | 44 (34.9)                 | 73 (33)        |
|                             | Ibadan                | 48 (31.4)               | 42 (33.3)                 | 74(33.5)       |
|                             | Aba                   | 38 (24.8)               | 40 (31.7)                 | 74(33.5)       |
| Age                         | 30 years or less      | 79 (51.6)               | 81 (64.3)                 | 55(25)         |
|                             | More than 30 years    | 74 (48.4)               | 45 (35.7)                 | 166(75)        |
| Education                   | No formal Education   | 0(0)                    | 12 (9.5)                  | 40(18)         |
|                             | Primary               | 8 (5.2)                 | 23 (18.3)                 | 97(44)         |
|                             | Secondary             | 105 (68.6)              | 85 (67.5)                 | 79(36)         |
|                             | Post-secondary        | 40 (26.1)               | 6 (4.8)                   | 5(2)           |
| Training                    | Yes                   | 125 (81.7)              | 101 (80.2)                | 157(71)        |
|                             | No                    | 28 (18.3)               | 25 (19.8)                 | 64(29)         |
| Training type received      | On-the-job training   | 148 (96.7)              | 126 (100)                 | 219(99.1)      |
|                             | Training by an expert | 5 (3.3)                 | 0 (0)                     | 2(0.9)         |
| Kind of employment          | Permanent             | 136 (88.9)              | 112 (88.9)                | 206(93.2)      |
|                             | Temporary             | 17 (11.1)               | 14 (11.1)                 | 15(6.8)        |
| Position in business        | Business owner        | 98 (64.1)               | 56 (44.4)                 | 176(79.6)      |
|                             | Employee/Apprentice   | 50 (32.7)               | 60 (47.6)                 | 27(12.2)       |
|                             | Family business       | 5 (3.3)                 | 10 (7.9)                  | 18(8.1)        |
| Years of work experience    | 1-10 years            | 115 (75.2)              | 101 (80.2)                | 96(43.4)       |
|                             | More than 10 years    | 38 (24.8)               | 25 (19.8)                 | 125(56.6)      |
| Work-hours/<br>day          | 8 hours or less       | 48 (31.4)               | 26 (20.6)                 | 93(42)         |
|                             | More than 8 hours     | 105 (68.6)              | 100 (79.4)                | 128(58)        |
| Income                      | N2000 or less         | 86 (30.8)               | 84 (30.1)                 | 116(52.5)      |
|                             | N2001-N5000           | 36 (12.9)               | 27 (9.7)                  | 82(37.1)       |
|                             | More than N5000       | 31 (11.1)               | 15 (5.4)                  | 23(10.4)       |
| Use of PPE                  | Yes                   | 11(7.2)                 | 40 (31.7)                 | 115(52)        |
|                             | No                    | 142 (92.8)              | 86 (68.3)                 | 106(48)        |
| Ethnicity                   | Igbo                  | 73 (47.7)               | 48 (38.1)                 | 60 (27.1)      |
|                             | Yoruba                | 64 (41.8)               | 47 (37.3)                 | 113 (51.1)     |
|                             | Hausa                 | 0 (0)                   | 18 (14.3)                 | 29 (13.1)      |
|                             | Others                | 16 (10.5)               | 13 (10.3)                 | 19(8.6)        |

**Table S2.** Knowledge of work health risk.

| Knowledge of Health Risk (Scores)                                                                             | Job Designation |                   |                             |
|---------------------------------------------------------------------------------------------------------------|-----------------|-------------------|-----------------------------|
|                                                                                                               | Repairers (153) | Dismantlers (126) | Butchers = 221(100)<br>n(%) |
| For EW: what type of chemicals come from this second hand electronics during recycling                        | 7 (4.6)         | 27(21.4)          | 221 (100)                   |
| For B: what type of substances come from the animals (2)                                                      |                 |                   |                             |
| For EW: Do you think chemicals from second-hand electronics can affect health?                                | 44 (28.8)       | 40 (31.7)         | 49 (22.2)                   |
| For B:Do you think substances from the animals can affect health? (1)                                         |                 |                   |                             |
| Which route of exposure (entrance to the body) do you think the chemicals/substances can enter your body? (1) | 56 (36.6)       | 63 (50)           | 130 (58.8)                  |
| Could you list the Personal Protective Equipment (PPE) you need for your work? (2)                            | 52 (34)         | 67(53.2)          | 154 (69.7)                  |
| What health problems or illnesses do you think can happen due to work environment? (2)                        | 28 (18.3)       | 32 (25.4)         | 99 (44.8)                   |
| Knowledge level                                                                                               |                 |                   |                             |
| Poor Knowledge                                                                                                | 149 (97.4)      | 96 (76.2)         | 54 (24.4)                   |
| Good knowledge                                                                                                | 4 (2.6)         | 30 (23.8)         | 167 (75.6)                  |
| Knowledge mean score                                                                                          | 2.59 ± 1.24     | 3.66 ± 1.82       | 5.9 ± 1.23                  |

EW = E-waste worker, B = Butchers

**Table S3.** Healthy work attitude at work.

| Attitude towards Health and Work(Scores)                                                | Repairers (153)<br>n(%) | Dismantlers (126)<br>n(%) | Butchers = 221(100)<br>n(%) |
|-----------------------------------------------------------------------------------------|-------------------------|---------------------------|-----------------------------|
| How would you perceive the injury you experience on this job most times (1)             |                         |                           |                             |
| Serious                                                                                 | 7 (4.6)                 | 20 (15.9)                 | 36 (16.3)                   |
| Mild/moderate                                                                           | 146 (95.4)              | 106 (84.1)                | 185 (83.7)                  |
| Do you think the sicknesses you had the last 12 months due to your jobs? (1)            |                         |                           |                             |
| Yes                                                                                     | 22 (14.4)               | 24 (19)                   | 39 (17.6)                   |
| No                                                                                      | 75 (49)                 | 90 (71.4)                 | 123 (55.7)                  |
| I don't know                                                                            | 56 (36.6)               | 12 (9.5)                  | 59 (26.7)                   |
| Do you worry about your health or that of your family due to your work environment? (1) |                         |                           |                             |
| No, do not worry                                                                        | 116 (75.8)              | 80 (63.5)                 | 146 (66.1)                  |
| Previously worried, but no longer worried                                               | 18 (11.8)               | 28 (22.2)                 | 59 (26.7)                   |
| Little worried                                                                          | 9 (5.9)                 | 6 (4.8)                   | 8 (3.6)                     |
| Yes, very worried                                                                       | 10 (6.5)                | 12 (9.5)                  | 8 (3.6)                     |
| What are the major challenges in your business (1 for health)                           |                         |                           |                             |
| Health                                                                                  | 6 (3.9)                 | 4 (3.2)                   | 51 (23.1)                   |
| Work environment                                                                        | 28 (18.3)               | 28 (22.2)                 | 31 (14)                     |
| Finances                                                                                | 83 (54.2)               | 59 (46.8)                 | 106 (48)                    |
| No response                                                                             | 35 (22.9)               | 27 (21.4)                 | 41 (18.6)                   |
| No challenges                                                                           | 1 (0.7)                 | 0 (0)                     | 4(1.8)                      |
| Attitude score                                                                          | 3.02 ± 1.13             | 3.6±1.66                  | 3.67±1.68                   |
| Poor Attitude (≤5)                                                                      | 124 (81)                | 81 (64.3)                 | 139 (62.9)                  |
| Good Attitude (>5)                                                                      | 29 (19)                 | 45 (35.7)                 | 82 (37.1)                   |

**Table S4.** Healthy work practice.

|                                                                                     | Repairers (153)<br>n(%) | Dismantlers(126)<br>n(%) | Butchers (221)<br>n(%) |
|-------------------------------------------------------------------------------------|-------------------------|--------------------------|------------------------|
| Use of PPE                                                                          |                         |                          |                        |
| (1) Yes                                                                             | 11 (7.2)                | 40 (31.7)                | 122 (55.2)             |
| (0) No                                                                              | 142 (92.8)              | 86 (68.3)                | 99 (44.8)              |
| Do you always wash your hand<br>before eating anything while at work?               |                         |                          |                        |
| Yes                                                                                 | 97 (63.4)               | 94 (74.6)                | 163 (73.8)             |
| No                                                                                  | 56 (36.6)               | 32 (25.4)                | 58 (26.2)              |
| Do you change your clothes after<br>work before going home?                         |                         |                          |                        |
| Yes                                                                                 | 14 (9.2)                | 65 (51.6)                | 170 (76.9)             |
| No                                                                                  | 134 (87.6)              | 54 (42.9)                | 44 (19.9)              |
| Sometimes                                                                           | 5 (3.3)                 | 7 (5.6)                  | 7 (3.2)                |
| How often do you bend and/twist<br>your upper body (uncomfortable<br>work position) |                         |                          |                        |
| Always/sometimes                                                                    | 66 (43.1)               | 87 (69)                  | 148 (67)               |
| (0) Rarely                                                                          | 59 (38.6)               | 30 (23.8)                | 34 (15.4)              |
| (0) Never                                                                           | 28 (18.3)               | 9 (7.1)                  | 39 (17.6)              |
| Do you take your work clothes or<br>shoes home for laundering                       |                         |                          |                        |
| Yes                                                                                 | 75 (49)                 | 50 (39.7)                | 133 (60.2)             |
| No                                                                                  | 72 (47.1)               | 75 (59.5)                | 88 (39.8)              |
| Not applicable                                                                      | 6 (3.9)                 | 1 (0.8)                  | -                      |
| Work conditions/position                                                            |                         |                          |                        |
| Uncomfortable work conditions                                                       | 49 (32)                 | 60 (47.6)                | 120 (54.3)             |
| Take a position that is comfortable                                                 | 98 (64.1)               | 59 (46.8)                | 79 (35.7)              |
| No Response                                                                         | 6 (3.9)                 | 7 (5.6)                  | 22 (10)                |
| Practice score mean                                                                 | 4.6 ± 1.35              | 5.8 ± 1.63               | 6.73 ± 1.6             |
| Practice rate - Poor practice (≤5)                                                  |                         |                          |                        |
|                                                                                     | 128 (83.7)              | 63 (50)                  | 67 (30.3)              |
| Good practice (>5)                                                                  |                         |                          |                        |
|                                                                                     | 25 (16.3)               | 63 (50)                  | 154 (69.7)             |

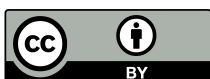

© 2017 by the authors; licensee MDPI, Basel, Switzerland. This article is an open access article distributed under the terms and conditions of the Creative Commons by Attribution (CC-BY) license (<http://creativecommons.org/licenses/by/4.0/>).
